# Supplementary material for: Paediatricians’ perspectives on global health priorities for newborn care in a developing country: a national survey from Nigeria
Source: BMC Int Health Hum Rights. 2012 Jul 2;12:9. doi: 10.1186/1472-698X-12-9 (PMC3519520; doi:10.1186/1472-698X-12-9)
Supplement: Additional file 1 — Survey on neonatal care in Nigeria. [file 1472-698X-12-9-S1.pdf]

# SURVEY ON NEONATAL CARE IN NIGERIA

## RESPONDENT PROFILE: (Check or type as applicable)

SEX: M ☐ F ☐ AGE (YRS): YEARS POST-MBBS: PAN MEMBER: Y ☐ N ☐

## CURRENT POSITION (Check as applicable):

PROFESSOR: ☐ (Senior) LECTURER: ☐ CONSULTANT: ☐ RESIDENT: ☐ MEDICAL OFFICER: ☐

## CURRENT/MOST RECENT PRACTICE SETTING (Check as applicable):

TERTIARY: ☐ GENERAL/SECONDARY: ☐ HEALTH CENTRE: ☐ OTHER: ☐

## EMPLOYER(S) (Check as applicable):

GOVERNMENT: ☐ PRIVATE: ☐ NGO: ☐ INTERNATIONAL: ☐ OTHER: ☐

## INSTRUCTIONS

The following conditions are associated with significant neonatal mortality, morbidity and long-term disability in Nigeria. Kindly rank these conditions on a priority/burden scale of 1 (highest) to 10 (least) for the specified criteria in columns A, B, C & D based on your current or past experience in newborn care. In addition, please indicate in the last column (E) how you may allocate a possible grant of US\$100,000 across these conditions to address the burden of disease in your setting.

| CONDITIONS              | A                      | B         | C         | D          | E                  |
|-------------------------|------------------------|-----------|-----------|------------|--------------------|
|                         | HOSPITAL<br>ADMISSIONS | MORTALITY | MORBIDITY | DISABILITY | ALLOCATION<br>US\$ |
| PREMATURITY/LBW         |                        |           |           |            |                    |
| BIRTH ASPHYXIA          |                        |           |           |            |                    |
| NEONATAL SEPSIS         |                        |           |           |            |                    |
| NEONATAL MENINGITIS     |                        |           |           |            |                    |
| NEONATAL PNEUMONIA      |                        |           |           |            |                    |
| DIARRHOEA               |                        |           |           |            |                    |
| NEONATAL TETANUS        |                        |           |           |            |                    |
| NEONATAL JAUNDICE       |                        |           |           |            |                    |
| CONGENITAL DEFECTS      |                        |           |           |            |                    |
| OTHERS (Specify below)* |                        |           |           |            |                    |
| *                       |                        |           |           | TOTAL US\$ | 100,000.00         |
| REMARKS (IF ANY):       |                        |           |           |            |                    |
| EMAIL:                  |                        |           | DATE:     |            |                    |
